# Supplementary material for: Development of an effervescent reaction-enhanced microextraction method for preconcentration/extraction of trace estrogens in milk using a reduced graphene oxide-assisted ionic liquid-based nanofluid
Source: Royal Society of Chemistry journal article supplement (doi:10.1039/c9ay00803a), 2019-01-01
Supplement: c9ay00803a1.pdf [file c9ay00803a1.pdf]

**Supplementary Fig. 1.** The molecular structures of estrogens investigated in this study

**Supplementary Fig. 2.** The images of an effervescent tablet and reaction

**Supplementary Fig. 3.** Effect of extraction temperature

**Supplementary Table 1.** PBD of variables (in coded levels) with the average ERs of BPs as response

| Run | Factors         |              |       |    |                  |       |                  |               | ERs (%) |      |      |
|-----|-----------------|--------------|-------|----|------------------|-------|------------------|---------------|---------|------|------|
|     | A               | B            | C     | D  | E                | F     | G                | H             | E1      | DES  | HS   |
|     | Extraction time | Elution time | Dummy | pH | Extraction       | Dummy | Nanofluid volume | Eluent volume |         |      |      |
|     | (min)           | (min)        | 1     |    | temperature (°C) | 2     | ( $\mu$ L)       | (mL)          |         |      |      |
| 1   | 1               | 1            | -1    | -1 | -1               | 1     | -1               | 1             |         |      |      |
| 2   | 1               | 1            | 1     | -1 | -1               | -1    | 1                | -1            | 39.4    | 48.1 | 58.7 |
| 3   | -1              | 1            | 1     | 1  | -1               | -1    | -1               | 1             | 27.1    | 45.6 | 40.5 |
| 4   | -1              | -1           | -1    | -1 | -1               | -1    | -1               | -1            | 11.1    | 16.0 | 19.7 |
| 5   | 1               | -1           | 1     | 1  | 1                | -1    | -1               | -1            | 30.8    | 39.8 | 41.4 |

|    |    |    |    |    |    |    |    |    |       |       |       |
|----|----|----|----|----|----|----|----|----|-------|-------|-------|
| 6  | -1 | -1 | 1  | -1 | 1  | 1  | -1 | 1  | 20.4  | 25.4  | 24.58 |
| 7  | -1 | 1  | 1  | -1 | 1  | 1  | 1  | -1 | 29.31 | 41.45 | 43.0  |
| 8  | 1  | -1 | -1 | -1 | 1  | -1 | 1  | 1  | 52.4  | 62.8  | 63.7  |
| 9  | 1  | -1 | 1  | 1  | -1 | 1  | 1  | 1  | 50.2  | 75.2  | 74.6  |
| 10 | 1  | 1  | -1 | 1  | 1  | 1  | -1 | -1 | 33.9  | 47.9  | 46.0  |
| 11 | -1 | -1 | -1 | 1  | -1 | 1  | 1  | -1 | 34.0  | 44.0  | 49.9  |
| 12 | -1 | 1  | -1 | 1  | 1  | -1 | 1  | 1  | 46.5  | 62.0  | 59.9  |

**Note:** A: Extraction time, “-1” and “+1” represent 1 and 6 min, respectively; B: Elution time, “-1” and “+1” represent 2 and 6 min, respectively; D: pH, “-1” and “+1” represent 14 and 6, respectively; E: Extraction temperature, G: Nanofluid volume, “-1” and “+1” represent 30 and 50  $\mu\text{L}$ , respectively; H: Eluent volume, “-1” and “+1” represent 200 and 1500  $\mu\text{L}$ , respectively. The composition of an effervescent tablet: 0.31 g TTA and 0.21 g  $\text{Na}_2\text{CO}_3$ .

**Supplementary Table 2.** Factors, symbols and levels for the CCD

| Factor                             | Symbol | Level            |     |      |      |                   |
|------------------------------------|--------|------------------|-----|------|------|-------------------|
|                                    |        | - $\alpha$ (low) | -1  | 0    | 1    | + $\alpha$ (high) |
| Nanofluid volume ( $\mu\text{L}$ ) | A      | 30               | 38  | 50   | 62   | 70                |
| Extraction time (min)              | B      | 2                | 3.6 | 6    | 8.4  | 10                |
| pH                                 | C      | 2                | 3.6 | 6    | 8.4  | 10                |
| Eluent volume ( $\mu\text{L}$ )    | D      | 500              | 900 | 1500 | 2100 | 2500              |

**Experimental conditions:** elution time, 6 min; extraction temperature, 30 °C; composition of an effervescent tablet, 0.31 g TTA and 0.21 g  $\text{Na}_2\text{CO}_3$

**Supplementary Table 3.** Design matrix (coded value of variables) and responses for CCD

| Run | Block   | A: Nanofluid volume<br>( $\mu\text{L}$ ) | B: Extraction time<br>(min) | C: pH | D: Eluent volume<br>( $\mu\text{L}$ ) | ERs<br>(%) |
|-----|---------|------------------------------------------|-----------------------------|-------|---------------------------------------|------------|
| 1   | Block 1 | 50                                       | 6                           | 6     | 1500                                  | 90.3       |
| 2   | Block 1 | 38                                       | 8.4                         | 3.6   | 2100                                  | 56.7       |
| 3   | Block 1 | 62                                       | 8.4                         | 3.6   | 900                                   | 58.1       |
| 4   | Block 1 | 62                                       | 8.4                         | 8.4   | 900                                   | 50.3       |
| 5   | Block 1 | 62                                       | 3.6                         | 8.4   | 2100                                  | 40.7       |
| 6   | Block 1 | 50                                       | 6                           | 6     | 1500                                  | 86.2       |
| 7   | Block 1 | 38                                       | 3.6                         | 3.6   | 900                                   | 36.1       |
| 8   | Block 1 | 50                                       | 6                           | 6     | 1500                                  | 91.1       |
| 9   | Block 1 | 50                                       | 6                           | 6     | 1500                                  | 87.7       |
| 10  | Block 1 | 38                                       | 3.6                         | 8.4   | 900                                   | 29.8       |
| 11  | Block 1 | 62                                       | 3.6                         | 3.6   | 2100                                  | 47.2       |
| 12  | Block 1 | 38                                       | 8.4                         | 8.4   | 2100                                  | 48.6       |

|    |         |    |    |    |      |      |
|----|---------|----|----|----|------|------|
| 13 | Block 2 | 50 | 6  | 10 | 1500 | 17.9 |
| 14 | Block 2 | 50 | 6  | 6  | 1500 | 85.1 |
| 15 | Block 2 | 50 | 6  | 6  | 500  | 42.1 |
| 16 | Block 2 | 50 | 6  | 2  | 1500 | 21.2 |
| 17 | Block 2 | 50 | 2  | 6  | 1500 | 33.4 |
| 18 | Block 2 | 70 | 6  | 6  | 1500 | 88.2 |
| 19 | Block 2 | 50 | 10 | 6  | 1500 | 88.1 |
| 20 | Block 2 | 50 | 6  | 6  | 2500 | 86.7 |
| 21 | Block 2 | 30 | 6  | 6  | 1500 | 33.1 |
| 22 | Block 2 | 50 | 6  | 6  | 1500 | 85.2 |

---

Other experimental conditions: elution time, 6 min; extraction temperature, 30 °C; composition of an effervescent tablet, 0.31 g TTA and 0.21 g Na<sub>2</sub>CO<sub>3</sub>

**Supplementary Table 4.** Schemes for composition of acidic and alkaline sources

| Scheme | Acidic source                    | Alkaline source                 | Reaction equation                                                                                                                      |
|--------|----------------------------------|---------------------------------|----------------------------------------------------------------------------------------------------------------------------------------|
| 1#     | NaH <sub>2</sub> PO <sub>4</sub> | Na <sub>2</sub> CO <sub>3</sub> | NaH <sub>2</sub> PO <sub>4</sub> +Na <sub>2</sub> CO <sub>3</sub> =Na <sub>3</sub> PO <sub>4</sub> +CO <sub>2</sub> ↑+H <sub>2</sub> O |
| 2#     | TTA                              | Na <sub>2</sub> CO <sub>3</sub> | (HO-CH-COOH) <sub>2</sub> +Na <sub>2</sub> CO <sub>3</sub> =(HO-CH-COONa) <sub>2</sub> + H <sub>2</sub> O+CO <sub>2</sub> ↑            |
| 3#     | NaH <sub>2</sub> PO <sub>4</sub> | NaHCO <sub>3</sub>              | NaH <sub>2</sub> PO <sub>4</sub> +NaHCO <sub>3</sub> =Na <sub>2</sub> HPO <sub>4</sub> +CO <sub>2</sub> ↑+H <sub>2</sub> O             |
| 4#     | TTA                              | NaHCO <sub>3</sub>              | (HO-CH-COOH) <sub>2</sub> +NaHCO <sub>3</sub> =(HO-CH-COONa) <sub>2</sub> +2CO <sub>2</sub> ↑+2H <sub>2</sub> O                        |

**Supplementary Table 5.** Effervescent reaction time for the different tablet composition

| No | Acid source                                 | Alkali source                              | Effervescent time (min) |
|----|---------------------------------------------|--------------------------------------------|-------------------------|
| 1  | NaH <sub>2</sub> PO <sub>4</sub> (2.0 μmol) | Na <sub>2</sub> CO <sub>3</sub> (2.0 μmol) | 6.5                     |
| 2  | TTA (2 μmol)                                | Na <sub>2</sub> CO <sub>3</sub> (2.0 μmol) | 3.0                     |
| 3  | NaH <sub>2</sub> PO <sub>4</sub> (2.0 μmol) | NaHCO <sub>3</sub> (2.0 μmol)              | 5.5                     |
| 4  | TTA (1.0 μmol)                              | NaHCO <sub>3</sub> (2.0 μmol)              | 1.0                     |

**Note:** Reaction temperature, 30 °C.
